# Supplementary material for: Visual colorimetric detection of TNT and 2,4-DNT using as-prepared hexaazamacrocycle-capped gold nanoparticles
Source: Royal Society of Chemistry journal article supplement (doi:10.1039/c3ay41824c), 2013-10-22
Supplement: c3ay41824c.pdf [file c3ay41824c.pdf]

## Supporting Information

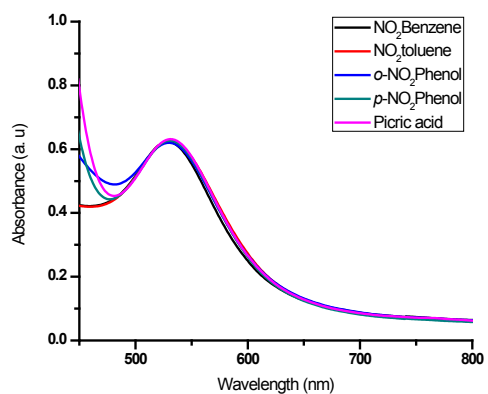

Fig. S1 UV-vis spectra of AuNPs after addition of the nitrocompounds.

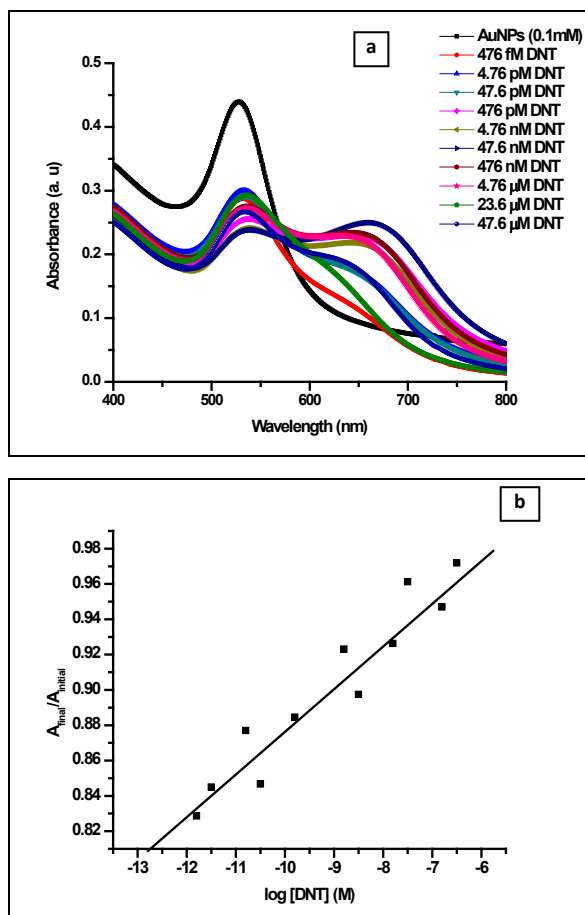

Fig. S2 (a) UV-vis spectra of AuNPs before and after addition of different concentrations of 2,4-DNT, concentration of nitrocompound in the final solutions ranges from 47.6 μM to 476 fM, (b) Plot of  $A_{\text{final}}/A_{\text{initial}}$  against  $\log [2,4\text{-DNT}]$  for 2,4-DNT assay.

**Table S1** Literature data on sensing of TNT and 2,4-DNT using variety of nanoparticles. The reference numbers given in the last column are the references shown in main manuscript.

| S.No | Analyte         | Nanosensor                                                              | Method of detection              | Low Limit of Detection         | Ref       |
|------|-----------------|-------------------------------------------------------------------------|----------------------------------|--------------------------------|-----------|
| 1.   | TNT             | Au@SiO <sub>2</sub> @Ag <sub>15</sub> MF                                | Fluorescence,                    | Sub-zeptomole level,           | 17e       |
|      |                 |                                                                         | Colorimetric                     | >44 μM                         |           |
| 2.   | TNT             | Popcorn shaped AuNPs functionalized SWCNT                               | SERS                             | 100 fM                         | 18b       |
| 3.   | TNT and 2,4-DNT | As prepared amine capped AuNPs                                          | Visual,                          | 476 fM (TNT and 2,4-DNT),      | This work |
|      |                 |                                                                         | Colorimetric                     | 155 fM and 359 fM respectively |           |
| 4.   | TNT, DNT        | EDA modified AuNPs                                                      | Naked eye,                       | 400 pM,                        | 19b       |
|      |                 |                                                                         | Colorimetric,                    | 40 pM, 4 μM                    |           |
|      |                 |                                                                         | DLS                              | 400 fM                         |           |
| 5.   | TNT             | Cysteamine modified AuNPs                                               | Visual detection within 10min,   | nM level,                      | 1a        |
|      |                 |                                                                         | Colorimetric                     | 500 fM                         |           |
| 6.   | TNT             | Cysteine modified AuNPs                                                 | SERS                             | 2 pM                           | 18a       |
| 7.   | TNT             |                                                                         | Immunosensor                     | 440 nM- 44 pM                  | 21b       |
| 8.   | TNT             | ATP functionalized AuNPs                                                | Colorimetric,                    | 50 μM,                         | 19a       |
|      |                 |                                                                         | DLS                              | 100 pM                         |           |
| 9.   | TNT             | ATP functionalized AuNPs                                                | Two Photon Scattering assay      | 120 pM                         | 21c       |
| 10.  | TNT and DNT     | pATP monolayer modified electrode,                                      | Electrochemical method           | 75 nM and 5 μM                 | 20b       |
|      |                 | Cross-linking of AuNPs by oligothioaniline,                             |                                  | 2 nM,                          |           |
|      |                 | π donor oligoaniline cross-linked AuNPs functionalized electrode        |                                  | 200 pM                         |           |
| 11.  | TNT             | NH <sub>2</sub> -Capped-nanocrystal ZnS-Mn <sup>2+</sup>                | Fluorescence                     | 1 nM                           | 17d       |
| 12.  | TNT             | Fluorescent dye and amine covalently modified onto Silica NPs           | FRET                             | 1 nM                           | 17c       |
| 13.  | TNT             | Nanocomposite modified GC electrodecontaining CuNPs and SWCNT in nafion | Adsorptive stripping voltammetry | 4.4 nM                         | 20a       |
| 14.  | TNT and DNT     | EHDAB capped Au octahedron array                                        | SERS                             | nM level<br>10 nM              | 18d       |
| 15.  | TNT             | PPV@MSN-NH <sub>2</sub>                                                 | FRET                             | 600 nM                         | 17b       |
| 16.  | TNT             | NBD-APTS-Silica NPs                                                     | FRET                             | 1-100 μM                       | 17a       |
| 17.  | TNT             | Au@PAT NPs                                                              | SHINERS                          | 10 μM level                    | 21c       |

TNT=2,4,6-trinitrotoluene, 2,4-DNT=2,4-dinitrotoluene, PAT= poly(2-aminothiophenol), NPs= Nanoparticles, SHIERS= Shell-Isolated Nanoparticle Enhanced Raman Spectroscopy, SERS= Surface Enhanced Raman Scattering/Spectroscopy, FRET= Fluorescence resonance energy transfer, DLS= Dynamic Light Scattering, ZnS-NH<sub>2</sub>-Q NPs= Hydroquinone functionalized amine capped ZnS nanoparticle, PPV@MSN-NH<sub>2</sub>= Amine functionalized mesoporous SiO<sub>2</sub> NPs containing poly(p-phenylenevinylene), ATP= 4-Aminothiophenol, NBD-APTS-Silica NPs= Nitrobenzoxadiazole and 3-aminopropyltriethoxysilane silica NPs, EDA= Ethylenediamine, GC electrode= Glassy Carbon electrode, SWCNT= Single Walled Carbon Nanotube.
